# Supplementary material for: Biofouling changes the settling dynamics of macroplastic plates
Source: Springer Nature journal article supplement (doi:10.1038/s43247-024-01922-6), 2024-11-30
Supplement: MOESM2 [file 43247_2024_1922_MOESM2_ESM.pdf]

# 1 Supplementary material

## 2 Biofouling changes the settling dynamics of macroplastic plates

3 James Lofty<sup>1\*</sup>, Catherine Wilson<sup>1</sup>, Pablo Ouro<sup>2</sup>

4 <sup>1</sup> Cardiff University, School of Engineering, Hydro-Environmental Research Centre, Cardiff, Wales, UK.

5 <sup>2</sup> University of Manchester, School of Mechanical, Aerospace and Civil Engineering, Manchester, UK.

6 \* corresponding author: [LoftyJ@cardiff.ac.uk](mailto:LoftyJ@cardiff.ac.uk)

7

8 This PDF includes

9 Figures S1 – 5

10 Tables S1 - 5

11

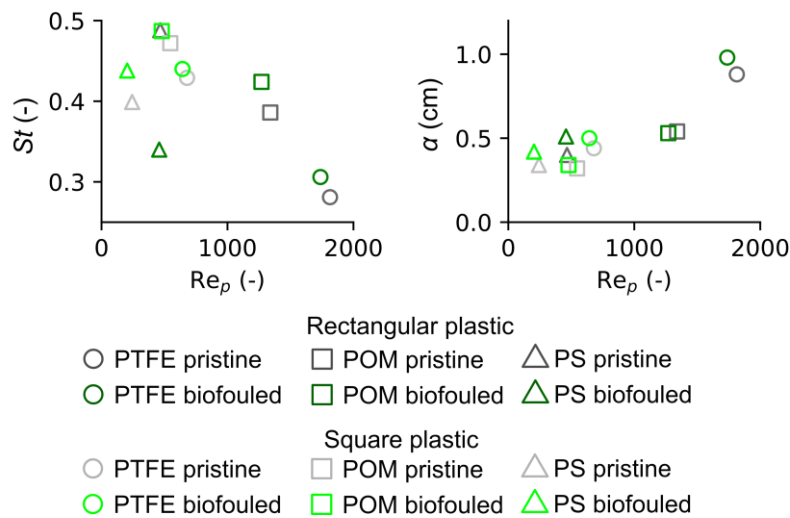

12

13 Figure S1. The average Strouhal number ( $St$ ) and oscillation amplitude ( $\alpha$ ) against the particle Reynolds number

14 ( $Re_p$ ). Pristine and biofouled plates are highlighted in different colours for clarity.

15

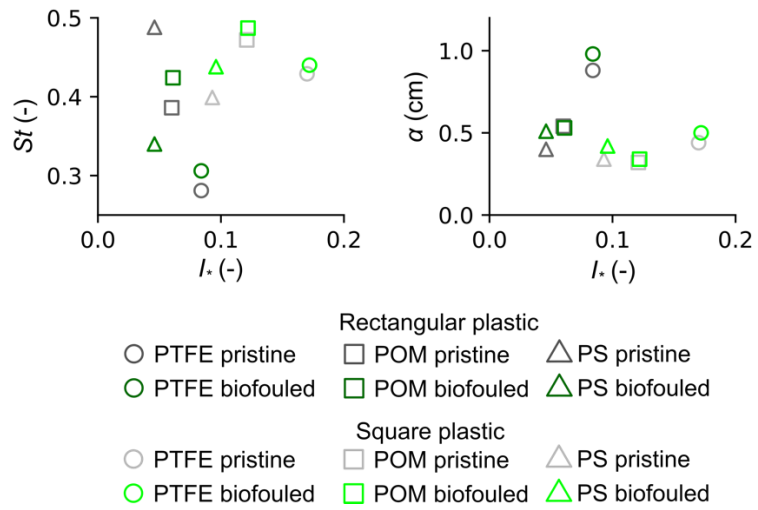

16

17 Figure S2. The average Strouhal number ( $St$ ) and oscillation amplitude ( $\alpha$ ) against the dimensionless moment of  
 18 inertia ( $I^*$ ). Pristine and biofouled plates are highlighted in different colours for clarity.

19

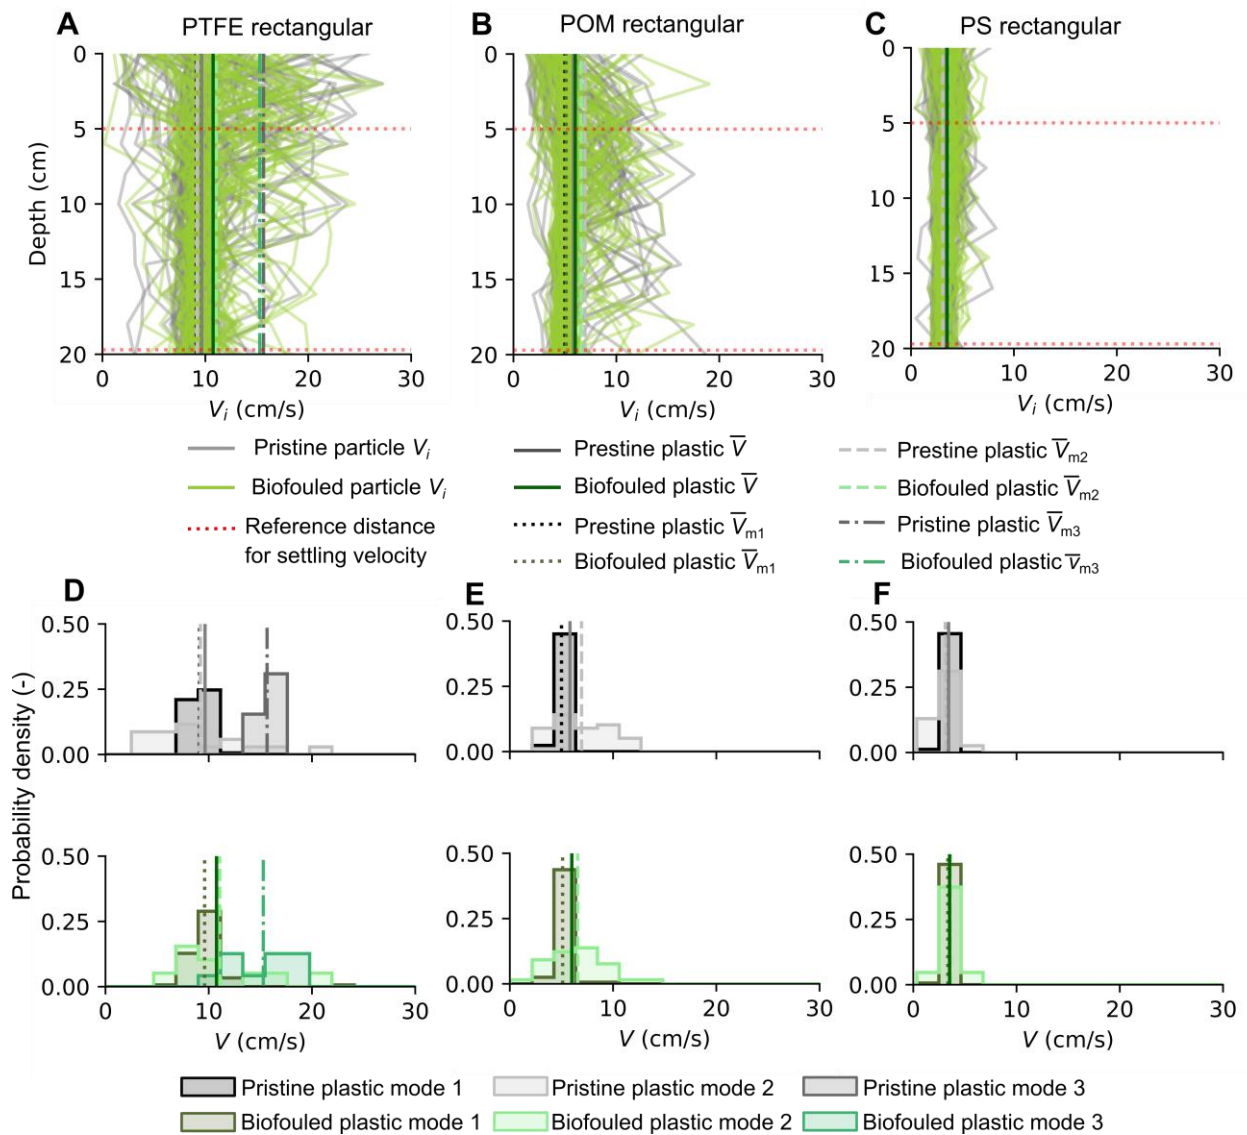

20

21 Figure S3 The instantaneous horizontal ( $V_i$ ) velocity of all biofouled and pristine rectangle plates against the  
 22 vertical distance travelled, considering 90 repeat tests. Vertical lines represent the average vertical ( $\bar{V}$ ) velocity  
 23 of biofouled and pristine rectangular particles, as well as the average vertical velocity of particles settling in  
 24 mode 1 ( $\bar{V}_{m1}$ ), mode 2 ( $\bar{V}_{m2}$ ) and mode 3 ( $\bar{V}_{m3}$ ), taken between a vertical depth of 5 – 20 cm. Transition periods  
 25 were ignored during calculations of  $\bar{V}_{m1}$ ,  $\bar{V}_{m2}$ ,  $\bar{V}_{m3}$ . D-F) Probability distribution functions of particle settling  
 26 velocity the various modes of vertical transport (mode 1, 2 or 3) for both pristine and biofouled plastics. Periods  
 27 where the particles were in transition between modes were omitted from probability distribution

28

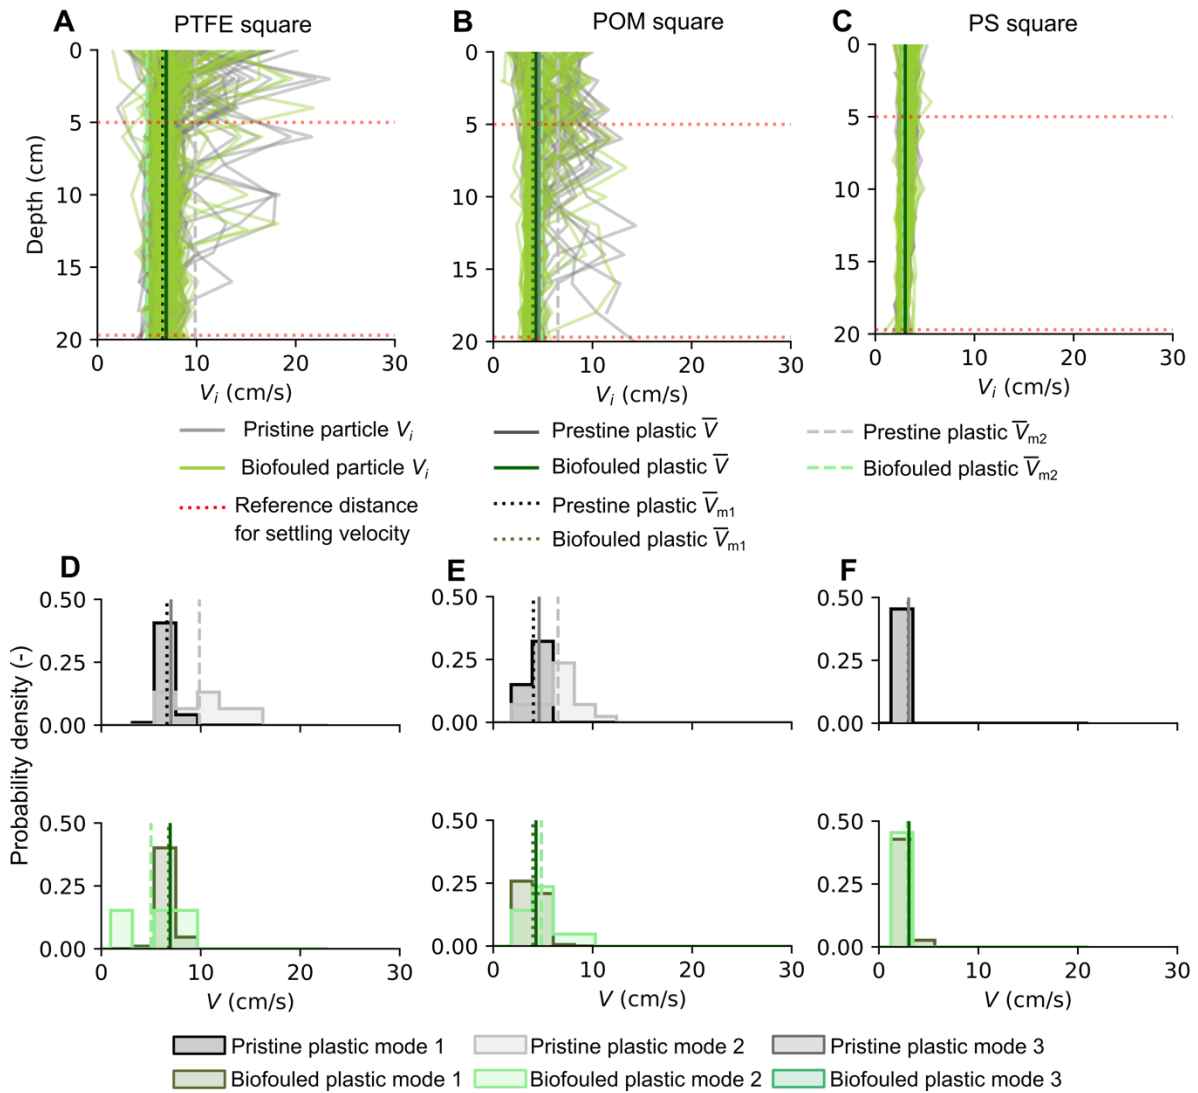

29

30 Figure S4 A-C) The instantaneous horizontal ( $V_i$ ) velocity of all biofouled and pristine square plates against the  
 31 vertical distance travelled, considering 90 repeat tests. Vertical lines represent the average vertical ( $\bar{V}$ ) velocity  
 32 of biofouled and pristine square particles, as well as the average vertical velocity of particles settling in mode 1  
 33 ( $\bar{V}_{m1}$ ), mode 2 ( $\bar{V}_{m2}$ ) and mode 3 ( $\bar{V}_{m3}$ ), taken between a vertical depth of 5 – 20 cm. Transition periods were  
 34 ignored during calculations of  $\bar{V}_{m1}$ ,  $\bar{V}_{m2}$ ,  $\bar{V}_{m3}$ . D-F) Probability distribution functions of particle settling velocity  
 35 the various modes of vertical transport (mode 1, 2 or 3) for both pristine and biofouled plastics. Periods where  
 36 the particles were in transition between modes were omitted from probability distribution

37

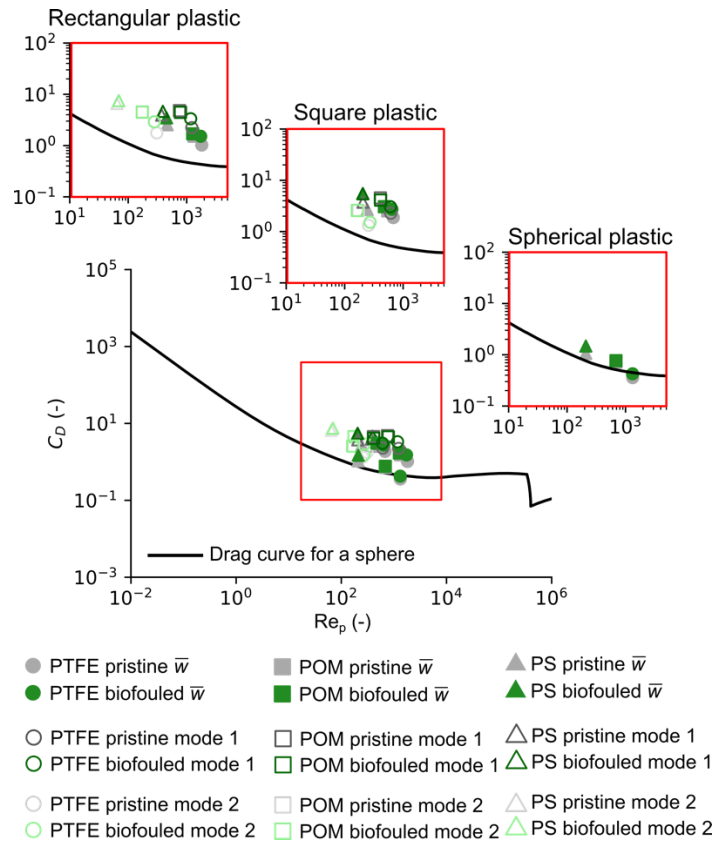

38

39

Figure S5. Drag coefficient  $C_d$  and Particle Reynolds number  $Re_p$  relationship for biofouled and pristine rectangular, square and spherical particles settling in modes 1, 2 and 3. Standardised drag curve for a sphere, following table 5.2 of <sup>1</sup>.

40

41

42

43

44

45

46

47

48

49

50

51 Table S1. Plastic properties of pristine and biofouled particles, considering a repeat of 10 samples, in terms of  
 52 density, areal average surface roughness and contact angle. *p*-values from a non-parametric Mann-Whitney *U*  
 53 test comparing pristine and biofouled particles are also presented (*N* = 10 for all groups).

|                                            | PTFE rectangle   |                  |                 | POM rectangle    |                  |                 | PS rectangle    |                  |                 |
|--------------------------------------------|------------------|------------------|-----------------|------------------|------------------|-----------------|-----------------|------------------|-----------------|
|                                            | Pristine         | Biofouled        | <i>p</i> -value | Pristine         | Biofouled        | <i>p</i> -value | Pristine        | Biofouled        | <i>p</i> -value |
| Density ± std (kg/m <sup>3</sup> )         | 1,965.15 ± 13.04 | 1,979.14 ± 14.94 | 0.064           | 1,403.54 ± 12.29 | 1,426.69 ± 16.20 | 0.007           | 1,073.18 ± 9.41 | 1,089.83 ± 10.78 | 0.003           |
| Areal average surface roughness ± std (µm) | 69.79 ± 7.76     | 131.2 ± 12.61    | 0.000           | 50.21 ± 3.67     | 103.36 ± 17.94   | 0.000           | 30.30 ± 3.47    | 137.7 ± 18.62    | 0.000           |
| Contact angle ± std (°)                    | 87.63 ± 2.21     | 68.4 ± 13.86     | 0.008           | 70.2 ± 5.86      | 43.99 ± 6.72     | 0.008           | 62.18 ± 4.53    | 36.96 ± 8.94     | 0.000           |
|                                            | PTFE square      |                  |                 | POM square       |                  |                 | PS square       |                  |                 |
|                                            | Pristine         | Biofouled        | <i>p</i> -value | Pristine         | Biofouled        | <i>p</i> -value | Pristine        | Biofouled        | <i>p</i> -value |
| Density ± std (kg/m <sup>3</sup> )         | 1,980.33 ± 17.08 | 2,009.38 ± 40.01 | 0.031           | 1,406.89 ± 10.74 | 1,427.11 ± 12.05 | 0.002           | 1,081.08 ± 8.85 | 1,118.12 ± 32.27 | 0.009           |
| Areal average surface roughness ± std (µm) | 61.99 ± 25.62    | 135.46 ± 45.76   | 0.002           | 50.4 ± 8.85      | 104.02 ± 36.25   | 0.003           | 44.63 ± 11.79   | 149.9 ± 15.66    | 0.000           |
| Contact angle ± std (°)                    | 85.15 ± 4.23     | 69.21 ± 10.84    | 0.016           | 68.22 ± 5.84     | 42.86 ± 10.11    | 0.008           | 59.27 ± 3.18    | 46.38 ± 8.86     | 0.016           |
|                                            | PTFE spherical   |                  |                 | POM spherical    |                  |                 | PS spherical    |                  |                 |
|                                            | Pristine         | Biofouled        | <i>p</i> -value | Pristine         | Biofouled        | <i>p</i> -value | Pristine        | Biofouled        | <i>p</i> -value |
| Density ± std (kg/m <sup>3</sup> )         | 2,143.12 ± 34.56 | 2,168.36 ± 30.64 | 0.050           | 1,332.10 ± 15.13 | 1,349.76 ± 14.74 | 0.014           | 1,040.80 ± 5.37 | 1,058.32 ± 9.38  | 0.001           |
| Areal average surface roughness ± std (µm) | 70.62 ± 19.92    | 122.24 ± 27.63   | 0.001           | 123.8 ± 23.29    | 146.92 ± 29.47   | 0.147           | 93.16 ± 24.47   | 135.01 ± 22.33   | 0.001           |

54

55

56

57

58

59

60

61

62

63 Table S2. Values of particle Reynolds numbers  $Re_p$  and the dimensionless moment of inertia  $I_*$  for all particles.

|        | PTFE rectangle |           | POM rectangle |           | PS rectangle |           |
|--------|----------------|-----------|---------------|-----------|--------------|-----------|
|        | Pristine       | Biofouled | Pristine      | Biofouled | Pristine     | Biofouled |
| $Re_p$ | 1814           | 1738      | 1340          | 1270      | 466          | 458       |
| $I_*$  | 0.084          | 0.084     | 0.060         | 0.061     | 0.046        | 0.046     |
|        | PTFE square    |           | POM square    |           | PS square    |           |
|        | Pristine       | Biofouled | Pristine      | Pristine  | Biofouled    | Pristine  |
| $Re_p$ | 679            | 643       | 546           | 478       | 243          | 204       |
| $I_*$  | 0.170          | 0.172     | 0.121         | 0.122     | 0.093        | 0.096     |
|        | PTFE sphere    |           | POM sphere    |           | PS sphere    |           |
|        | Pristine       | Biofouled | Pristine      | Pristine  | Biofouled    | Pristine  |
| $Re_p$ | 1324           | 1320      | 686           | 686       | 209          | 210       |

64

65

66

67 Table S3. The average horizontal drift for anisotropic particles settling in mode 1 and  $p$ -values from a non-  
 68 parametric Mann-Whitney  $U$  test comparing pristine and biofouled particles ( $N > 30$  for all groups).

|                                         | PTFE rectangle  |                 |            | POM rectangle   |                 |            | PS rectangle    |                 |            |
|-----------------------------------------|-----------------|-----------------|------------|-----------------|-----------------|------------|-----------------|-----------------|------------|
|                                         | Pristine        | Biofouled       | $p$ -value | Pristine        | Biofouled       | $p$ -value | Pristine        | Biofouled       | $p$ -value |
| Average horizontal drift $\pm$ std (cm) | $1.60 \pm 1.14$ | $2.15 \pm 1.30$ | 0.000      | $1.42 \pm 0.75$ | $1.62 \pm 0.85$ | 0.102      | $0.65 \pm 0.31$ | $1.48 \pm 0.76$ | 0.000      |
|                                         | PTFE square     |                 |            | POM square      |                 |            | PS square       |                 |            |
|                                         | Pristine        | Biofouled       | $p$ -value | Pristine        | Biofouled       | $p$ -value | Pristine        | Biofouled       | $p$ -value |
| Average horizontal drift $\pm$ std (cm) | $0.86 \pm 0.57$ | $0.99 \pm 0.68$ | 0.002      | $0.71 \pm 0.33$ | $0.77 \pm 0.24$ | 0.150      | $0.89 \pm 0.43$ | $1.36 \pm 0.86$ | 0.004      |

69

70

71

72

73

74

75 Table S4. Average oscillatory characteristics in terms of frequency  $f$  Strouhal number  $St$  and amplitude  $\alpha$   
 76 anisotropic particles settling in mode 1.  $p$ -values from a non-parametric Mann-Whitney  $U$  test comparing  
 77 pristine and biofouled particles are also presented ( $N > 30$  for all groups).

|                                 | PTFE rectangle  |                 |             | POM rectangle   |                 |             | PS rectangle    |                 |             |
|---------------------------------|-----------------|-----------------|-------------|-----------------|-----------------|-------------|-----------------|-----------------|-------------|
|                                 | Pristine        | Biofouled       | $p$ -values | Pristine        | Biofouled       | $p$ -values | Pristine        | Biofouled       | $p$ -values |
| $f \pm \text{std}$<br>(Hz)      | 1.73 $\pm$ 0.91 | 1.83 $\pm$ 0.77 | 0.245       | 1.52 $\pm$ 0.54 | 1.67 $\pm$ 0.93 | 0.083       | 0.94 $\pm$ 0.29 | 0.68 $\pm$ 0.39 | 0.001       |
| $St \pm \text{std}$             | 0.28 $\pm$ 0.14 | 0.31 $\pm$ 0.14 | 0.064       | 0.39 $\pm$ 0.14 | 0.42 $\pm$ 0.25 | 0.232       | 0.49 $\pm$ 0.14 | 0.34 $\pm$ 0.19 | 0.000       |
| $\alpha \pm \text{std}$<br>(cm) | 0.88 $\pm$ 0.3  | 0.98 $\pm$ 0.31 | 0.004       | 0.54 $\pm$ 0.15 | 0.53 $\pm$ 0.17 | 0.838       | 0.40 $\pm$ 0.13 | 0.51 $\pm$ 0.20 | 0.000       |
|                                 | PTFE square     |                 |             | POM square      |                 |             | PS square       |                 |             |
|                                 | Pristine        | Biofouled       | $p$ -values | Pristine        | Biofouled       | $p$ -values | Pristine        | Biofouled       | $p$ -values |
| $f \pm \text{std}$<br>(Hz)      | 2.52 $\pm$ 1.1  | 2.7 $\pm$ 0.74  | 0.186       | 1.91 $\pm$ 0.72 | 2.08 $\pm$ 0.7  | 0.091       | 0.84 $\pm$ 0.29 | 0.89 $\pm$ 0.41 | 0.186       |
| $St \pm \text{std}$             | 0.43 $\pm$ 0.18 | 0.44 $\pm$ 0.12 | 0.031       | 0.47 $\pm$ 0.18 | 0.49 $\pm$ 0.17 | 0.187       | 0.40 $\pm$ 0.16 | 0.44 $\pm$ 0.20 | 0.031       |
| $\alpha \pm \text{std}$<br>(cm) | 0.44 $\pm$ 0.13 | 0.50 $\pm$ 0.16 | 0.003       | 0.32 $\pm$ 0.06 | 0.34 $\pm$ 0.08 | 0.289       | 0.34 $\pm$ 0.13 | 0.42 $\pm$ 0.19 | 0.004       |

78

79

80

81

82 Table S5. The geometric properties of the pristine and biofouled plastic particles used in experiments,  
 83 including the plastic's maximum ( $L_1$ ), intermediate ( $L_2$ ) and smallest ( $L_3$ ) dimensions, the Corey Shape

84 Factor (CSF) <sup>2</sup>, calculated as  $L_3 / \sqrt{(L_1 L_2)}$ .

| Shape           | $L_1$ (mm) | $L_2$ (mm) | $L_3$ (mm) | CSF  |
|-----------------|------------|------------|------------|------|
| Rectangle plate | 20         | 10         | 1          | 0.07 |
| Square plate    | 10         | 10         | 1          | 0.10 |
| Spheres         | 5          | 5          | 5          | 1.00 |

85

86

87



88

89 **Supplementary References**

90 1. Clift, R., Grace, J. R. & Weber, M. E. Bubbles, Drops, and Particles (Dover Civil and

91 Mechanical Engineering). 380 (1978).

92 2. Corey, A. T. *et al.* Influence of shape on the fall velocity of sand grains. (1949)

93 doi:10.17616/R31NJMSY.

94

95

96

97

98
