# Supplementary material for: Biofouling changes the settling dynamics of macroplastic plates
Source: Springer Nature journal article supplement (doi:10.1038/s43247-024-01922-6), 2024-11-30
Supplement: MOESM3 [file 43247_2024_1922_MOESM3_ESM.pdf]

## Description of Additional Supplementary Files

**File name:** Supplementary Movie 1

**Description:** Three-dimensional tracking animations of settling pristine and biofouled macroplastics

**File name:** Supplementary Movie 2

**Description:** A comparative example of asymmetrical oscillations of macroplastic plates
